# Supplementary material for: A Genetic Model for the Female Sterility Barrier Between Asian and African Cultivated Rice Species
Source: Oxford University Press journal article supplement (doi:10.1534/genetics.110.116772), 2010-05-11

**FILE S3****Equations for calculating the expected gametic and allelic frequencies  
under Model 1**

The expected frequencies  $F_c$  of the different 1n-2c configurations can be derived from the recombination frequencies between the three  $S_I$  genes and between the  $S_I$  complex locus and the centromere (see schematic representation 1 below), and are given in Table S3-1.

The expected frequencies of each gamete that belong to a specific 1n-2c configuration are equal to  $F_c/4$ , where  $F_c$  is the expected frequency of the specific 1n-2c configuration.

Let  $D$  be the sum of the frequencies of the viable gametes. Under model 1,  $D$  simplifies to:

$$D = (1 - 2r_3) \left( \frac{r_2 + 1}{2} \right) + 2r_3 \left[ \frac{1}{2} + \frac{r_1}{2} - r_1 r_2 \right]$$

The expected frequencies of *viable* gametes are obtained by dividing their corresponding expected frequency by  $D$ .

Thus, the final frequency of gametes bearing the  $S_1^s$  allele,  $f(S_1^s)$ , is obtained by summing the individual frequencies of viable gamete that bear this allele. Under Model 1, this simplifies to:

$$f(S_1^s) = \left[ \frac{r_2}{2} + r_3(r_1 - r_2 - 2r_1 r_2) \right] / D$$

Similar equations can be derived for Models 2 to 4, with numerical examples based on observed data given in File “S1 - Genetic models.xlsx”.

Under all models, the estimated for recombination fractions  $r_1$  and  $r_2$  are naturally given by dividing the observed recombination fractions,  $r_1 \max$  and  $r_2 \max$ , by  $2D$ .

$$\hat{r}_1 = \frac{r_1 \max}{2D}; \hat{r}_2 = \frac{r_2 \max}{2D}.$$

In the case of the presence of the additional factor  $S_I C$  (see schematic representation 2 below), the effect of  $S_I C$  is applied after the initial selection due to the  $S_I A$ -  $S_I$ -  $S_I B$  locus action.

As  $S_I C$  only affects the  $S_I^s$  gametes when a recombination event occurs between  $S_I B$  and  $S_I C$ , the expected frequencies of these gametes are obtained by multiplying them by  $1 - r_3$ , where  $r_3$  is the recombination fraction between  $S_I B$  and  $S_I C$ , and dividing them by the relative sum of all gamete frequencies,  $1 - r_3 f(S_1^s)$ . The frequencies of other viable gametes are obtained by dividing them by the relative sum of all gamete frequencies,  $1 - r_3 f(S_1^s)$ .

TABLE S3-1

**Expected frequencies  $F_c$  of the different 1n-2c configuration expressed in function of the recombination frequencies between the three  $S_I$  genes, and associated gametic frequencies under no selection and Model 1 selection**

| <b>1n-2c configuration</b>                                                                                                                                                                                                                                                                                                                                                                    | <i>Expected configuration frequency without selection (<math>F_c</math>)</i> | <i>Expected gamete frequency without selection (<math>F_g</math>)</i> | <i>Survival under Model 1</i> | <i>Expected gamete frequency under selection (Model 1)</i> |
|-----------------------------------------------------------------------------------------------------------------------------------------------------------------------------------------------------------------------------------------------------------------------------------------------------------------------------------------------------------------------------------------------|------------------------------------------------------------------------------|-----------------------------------------------------------------------|-------------------------------|------------------------------------------------------------|
| $S_I A$ $S_I$ $S_I B$<br><div style="display: flex; align-items: center;"> <div style="border: 1px solid black; padding: 2px; margin-right: 5px;">s   s   s</div> <div style="border: 1px solid black; padding: 2px; margin-right: 5px;">s   s   s</div> <div style="font-size: 3em; margin: 0 10px;">}</div> <div> <math>F_c^1 = (1 - 2r_5)[1 - 2(r_1 + r_2 - 2r_1r_2)]</math> </div> </div> |                                                                              | $F_c^1/4$<br>$F_c^1/4$                                                | Aborted<br>Aborted            |                                                            |
| <div style="border: 1px solid black; padding: 2px; margin-right: 5px;">g   g   g</div> <div style="border: 1px solid black; padding: 2px; margin-right: 5px;">g   g   g</div> <div style="font-size: 3em; margin: 0 10px;">}</div>                                                                                                                                                            |                                                                              | $F_c^1/4$<br>$F_c^1/4$                                                | Viable<br>Viable              | $F_g/D$<br>$F_g/D$                                         |
| <div style="border: 1px solid black; padding: 2px; margin-right: 5px;">s   s   s</div> <div style="border: 1px solid black; padding: 2px; margin-right: 5px;">g   g   g</div> <div style="font-size: 3em; margin: 0 10px;">}</div>                                                                                                                                                            |                                                                              | $F_c^2/4$<br>$F_c^2/4$                                                | Aborted<br>Viable             | $F_g/D$                                                    |
| $F_c^2 = 2r_5[1 - 2(r_1 + r_2 - 2r_1r_2)]$                                                                                                                                                                                                                                                                                                                                                    |                                                                              |                                                                       |                               |                                                            |
| <div style="border: 1px solid black; padding: 2px; margin-right: 5px;">s   s   s</div> <div style="border: 1px solid black; padding: 2px; margin-right: 5px;">g   g   g</div> <div style="font-size: 3em; margin: 0 10px;">}</div>                                                                                                                                                            |                                                                              | $F_c^2/4$<br>$F_c^2/4$                                                | Aborted<br>Viable             | $F_g/D$                                                    |
| <div style="border: 1px solid black; padding: 2px; margin-right: 5px;">s   s   s</div> <div style="border: 1px solid black; padding: 2px; margin-right: 5px;">g   g   s</div> <div style="font-size: 3em; margin: 0 10px;">}</div>                                                                                                                                                            |                                                                              | $F_c^3/4$<br>$F_c^3/4$                                                | Viable<br>Viable              | $F_g/D$<br>$F_g/D$                                         |
| X                                                                                                                                                                                                                                                                                                                                                                                             |                                                                              |                                                                       |                               |                                                            |
| <div style="border: 1px solid black; padding: 2px; margin-right: 5px;">s   s   g</div> <div style="border: 1px solid black; padding: 2px; margin-right: 5px;">g   g   g</div> <div style="font-size: 3em; margin: 0 10px;">}</div>                                                                                                                                                            |                                                                              | $F_c^3/4$<br>$F_c^3/4$                                                | Aborted<br>Viable             | 0<br>$F_g/D$                                               |
| <div style="border: 1px solid black; padding: 2px; margin-right: 5px;">s   s   s</div> <div style="border: 1px solid black; padding: 2px; margin-right: 5px;">g   s   s</div> <div style="font-size: 3em; margin: 0 10px;">}</div>                                                                                                                                                            |                                                                              | $F_c^4/4$<br>$F_c^4/4$                                                | Aborted<br>Aborted            | 0<br>0                                                     |
| X                                                                                                                                                                                                                                                                                                                                                                                             |                                                                              |                                                                       |                               |                                                            |
| <div style="border: 1px solid black; padding: 2px; margin-right: 5px;">s   g   g</div> <div style="border: 1px solid black; padding: 2px; margin-right: 5px;">g   g   g</div> <div style="font-size: 3em; margin: 0 10px;">}</div>                                                                                                                                                            |                                                                              | $F_c^4/4$<br>$F_c^4/4$                                                | Viable<br>Viable              | $F_g/D$<br>$F_g/D$                                         |
| <div style="border: 1px solid black; padding: 2px; margin-right: 5px;">s   s   s</div> <div style="border: 1px solid black; padding: 2px; margin-right: 5px;">s   g   s</div> <div style="font-size: 3em; margin: 0 10px;">}</div>                                                                                                                                                            |                                                                              | $F_c^5/4$<br>$F_c^5/4$                                                | Viable<br>Viable              | $F_g/D$<br>$F_g/D$                                         |
| X   X                                                                                                                                                                                                                                                                                                                                                                                         |                                                                              |                                                                       |                               |                                                            |
| <div style="border: 1px solid black; padding: 2px; margin-right: 5px;">g   s   g</div> <div style="border: 1px solid black; padding: 2px; margin-right: 5px;">g   g   g</div> <div style="font-size: 3em; margin: 0 10px;">}</div>                                                                                                                                                            |                                                                              | $F_c^5/4$<br>$F_c^5/4$                                                | Aborted<br>Viable             | 0<br>$F_g/D$                                               |
| $F_c^5 = 4r_1r_2(1 - 2r_5)$                                                                                                                                                                                                                                                                                                                                                                   |                                                                              |                                                                       |                               |                                                            |

|                                                                                                                              |   |                             |           |         |         |
|------------------------------------------------------------------------------------------------------------------------------|---|-----------------------------|-----------|---------|---------|
| <div style="display: inline-block; border: 1px solid black; padding: 2px; margin: 2px;"> s    s    s<br/> s    s    g </div> | } | $F_c^6 = 4r_2r_5(1 - 2r_1)$ | $F_c^6/4$ | Aborted | 0       |
|                                                                                                                              |   |                             | $F_c^6/4$ | Aborted | 0       |
| X                                                                                                                            |   |                             |           |         |         |
| <div style="display: inline-block; border: 1px solid black; padding: 2px; margin: 2px;"> g    g    s<br/> g    g    g </div> |   |                             | $F_c^6/4$ | Viable  | $F_g/D$ |
|                                                                                                                              |   |                             | $F_c^6/4$ | Viable  | $F_g/D$ |
| <div style="display: inline-block; border: 1px solid black; padding: 2px; margin: 2px;"> s    s    s<br/> s    g    g </div> | } | $F_c^7 = 4r_1r_5(1 - 2r_2)$ | $F_c^7/4$ | Viable  | $F_g/D$ |
|                                                                                                                              |   |                             | $F_c^7/4$ | Viable  | $F_g/D$ |
| X                                                                                                                            |   |                             |           |         |         |
| <div style="display: inline-block; border: 1px solid black; padding: 2px; margin: 2px;"> g    s    s<br/> g    g    g </div> |   |                             | $F_c^7/4$ | Aborted | 0       |
|                                                                                                                              |   |                             | $F_c^7/4$ | Viable  | $F_g/D$ |
| <div style="display: inline-block; border: 1px solid black; padding: 2px; margin: 2px;"> s    s    s<br/> g    s    g </div> | } | $F_c^8 = 8r_1r_2r_5$        | $F_c^8/4$ | Aborted | 0       |
|                                                                                                                              |   |                             | $F_c^8/4$ | Aborted | 0       |
| X   X                                                                                                                        |   |                             |           |         |         |
| <div style="display: inline-block; border: 1px solid black; padding: 2px; margin: 2px;"> s    g    s<br/> g    g    g </div> |   |                             | $F_c^8/4$ | Viable  | $F_g/D$ |
|                                                                                                                              |   |                             | $F_c^8/4$ | Viable  | $F_g/D$ |

The sum of the frequencies of the viable gametes thus simplifies to:

$$D' = D / (1 - f(S_1^s)) r_3,$$

while the final frequency of gametes bearing the  $S_1^s$  allele converts to:

$$f'(S_1^s) = (1 - r_3) f(S_1^s) / (1 - f(S_1^s) r_3),$$

and the estimates for  $r_1$  and  $r_2$  convert to:

$$\hat{r}_1 = \frac{r_1 \max}{2D'}; \hat{r}_2 = \frac{r_2 \max}{2D'}.$$

**Schematic representation 1:** positions of the three  $S_I$  genes on rice chromosome 6, expressed as recombination fractions between each other and between the  $S_I$  locus and the centromere.

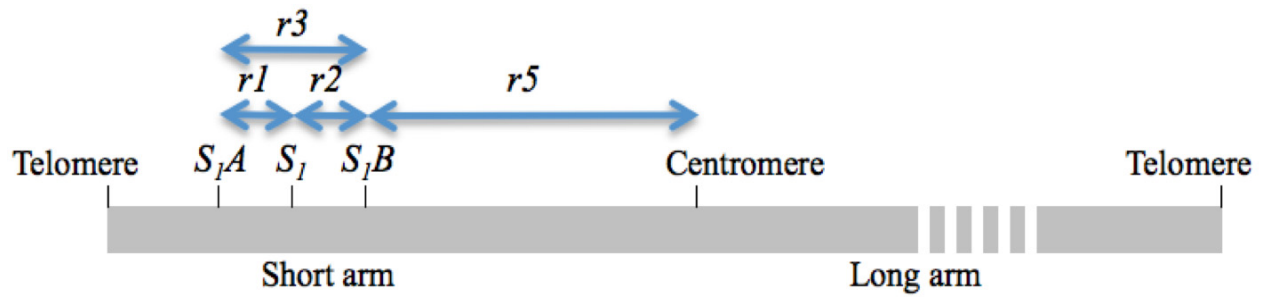

**Schematic representation 2:** positions of the three  $S_I$  genes and the  $S_I C$  gene on rice chromosome 6, expressed as recombination fractions between each other and between the  $S_I$  locus and the centromere.

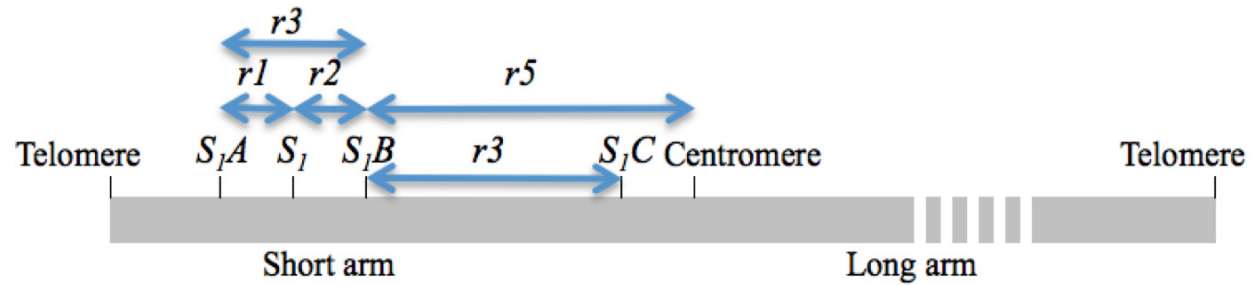

Supplement: files3.pdf [file files3.pdf]
