# Supplementary material for: A Genetic Model for the Female Sterility Barrier Between Asian and African Cultivated Rice Species
Source: Oxford University Press journal article supplement (doi:10.1534/genetics.110.116772), 2010-05-11
Supplement: files2.pdf [file files2.pdf]

**FILE S2****Estimation of the precision of the mapping of a transmission ratio distorter locus (TRDL) using the  $k_{max}$  measurement by simulation**

In order to estimate the precision of the mapping of a transmission ratio distorter locus (TRDL) using the  $k_{max}$  measurement, we simulated 10,000 BC1F1 populations of 734 individuals each, bearing one chromosome segment of 5 cM long spanned by 50 markers (10 markers per cM). A TRDL was located in the middle of the segment at the position 2.5 cM, and induced a differential viability rate of 0.95. For each population generated, the  $k$  statistic was computed for each marker. We then determined the percentage of cases where the maximum value of  $k$  ( $k_{max}$ ) was observed on each marker surrounding the TRDL and plotted this percentage value against the position on the chromosome segment.

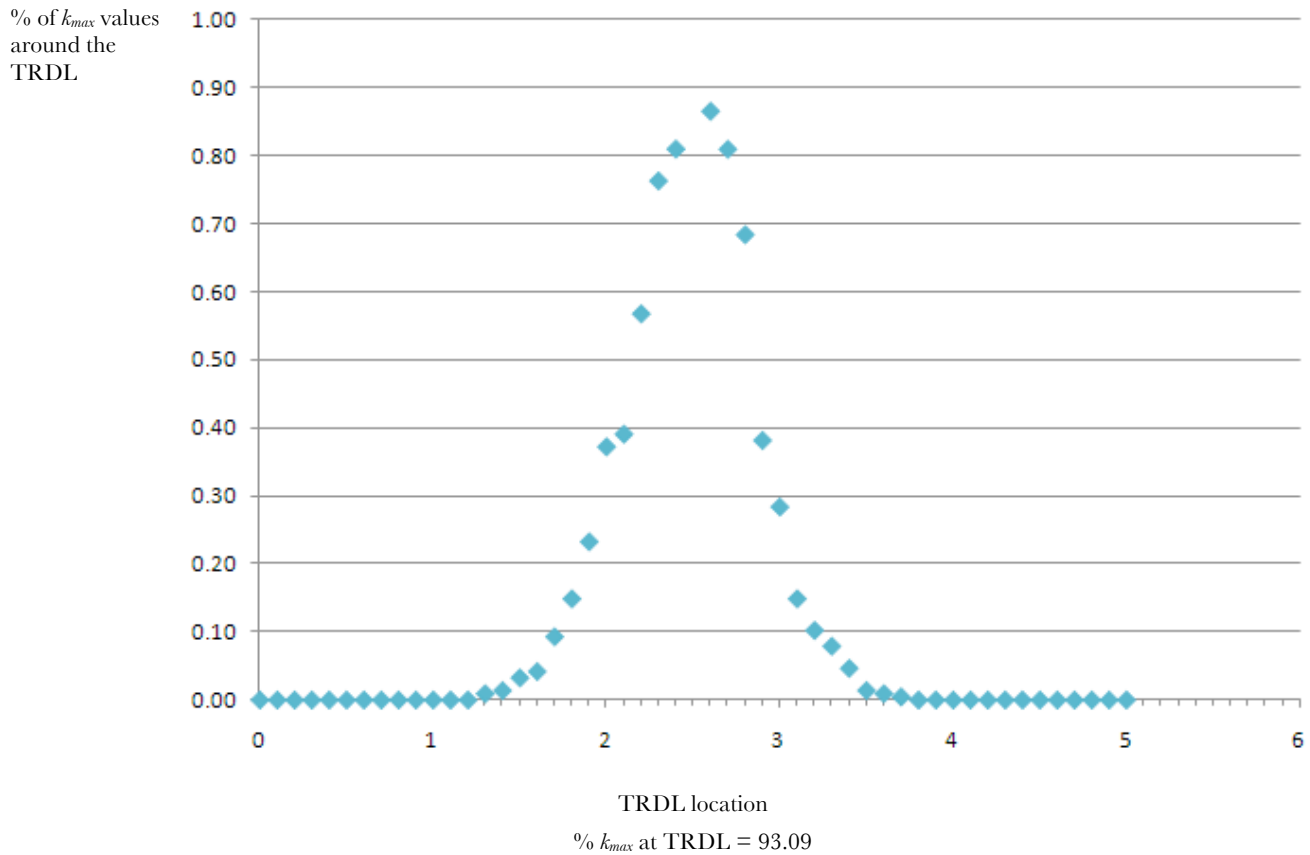

The simulation results showed a percentage of  $k_{max}$  of 93.09 % at the TRDL position, and showed that 95.58 % of the  $k_{max}$  fell in an interval of 0.3 cM around the TRDL, meaning that there is a 95 % probability of observing a  $k_{max}$  in an interval of slightly less than 0.3 cM around the true TRDL position. Converting this genetic distance to a physical one using the local rate of 80 kbp/cM (derived from our data, see Figure 3) leads to an interval of slightly less than 24 kb.
